# Supplementary material
Source: PubMed Central journal article supplement (PMC4249226)

## Supplementary Information

**Table S1.** *Lactobacillaceae*-affiliated OTUs in female mice of 5 weeks of age in MRL and MRL/lpr strains.

**Table S2.** *Lachnospiraceae*-affiliated OTUs in female mice of 5 weeks of age in MRL and MRL/lpr strains.

**Table S3.** Raw data used for correlation analysis shown in Fig. 3C.

**Figure S1.** Taxonomy assignments for low-abundance OTUs in 5-week-old, female MRL and MRL/lpr mice. Low-abundance was defined as OTUs making up less than 0.1% of all six samples. RF9 is a family within Mollicutes class within the Tenericutes phylum. Significance of difference between the two mouse strains was determined by unpaired *t*-test assuming unequal variance. \* $P < 0.05$ ; \*\*\* $P < 0.001$ .

**Figure S2.** Gender-specific differences in microbial community composition and diversity. (A) Bacterial taxa for abundant OTUs (>0.1%) in 14-week-old mice. (B) Rare OTUs (<0.1%) taxonomy assignments. Statistical significance was determined by two-way ANOVA followed by pairwise *t*-test with TukeyHSD-adjusted significance. \* $P < 0.05$  comparing female versus male MRL mice. (C) Principal coordinate analysis of the effect of genders and strains on microbial communities. (D) Microbial community richness measured as phylogenetic diversity (PD) and Shannon's entropy.

**Figure S3.** Effect of vitamin A treatments on gut microbiota. (A) Principal coordinate analysis of the effect of RA and VARA on microbial communities. (B) Community richness analysis. PD: phylogenetic diversity.

Table S1.

| # Constructed from biom file  | MRL  | MRL  | MRL  | MRL/pr | MRL/pr | MRL/pr |                                             |
|-------------------------------|------|------|------|--------|--------|--------|---------------------------------------------|
| #OTU ID                       | 71   | 70   | 69   | 84     | 86     | 85     | taxonomy                                    |
| New.CleanUp.ReferenceOTU16796 | 10   | 2    | 3    | 0      | 1      | 0      | Lactobacillus; Lactobacillus_odoratitofui   |
| 851886                        | 329  | 420  | 220  | 896    | 136    | 117    | Lactobacillus; Lactobacillus_oris           |
| New.CleanUp.ReferenceOTU39392 | 1    | 4    | 0    | 4      | 0      | 0      | Lactobacillus; Lactobacillus_oris           |
| 949863                        | 3    | 1    | 1    | 6      | 1      | 2      | Lactobacillus; Lactobacillus_oris           |
| 578794                        | 2    | 1    | 2    | 3      | 1      | 1      | Lactobacillus; Lactobacillus_oris           |
| New.CleanUp.ReferenceOTU45047 | 1    | 1    | 2    | 6      | 0      | 2      | Lactobacillus; Lactobacillus_oris           |
| 254011                        | 0    | 0    | 2    | 4      | 0      | 0      | Lactobacillus; Lactobacillus_oris           |
| New.ReferenceOTU233           | 0    | 2    | 0    | 0      | 0      | 0      | Lactobacillus; Lactobacillus_pontis         |
| New.CleanUp.ReferenceOTU11058 | 8    | 4    | 10   | 0      | 0      | 5      | Lactobacillus; Lactobacillus_salivarius     |
| New.CleanUp.ReferenceOTU7196  | 7    | 0    | 6    | 0      | 2      | 3      | Lactobacillus; Lactobacillus_sp._KC45a      |
| 590168                        | 127  | 82   | 170  | 0      | 12     | 15     | Lactobacillus; Lactobacillus_sp._KC45b      |
| New.ReferenceOTU174           | 79   | 34   | 80   | 0      | 22     | 13     | Lactobacillus; Lactobacillus_sp._KC45b      |
| 563625                        | 3    | 1    | 1    | 5      | 0      | 0      | Lactobacillus; Lactobacillus_vaginalis      |
| 1055714                       | 2385 | 3601 | 2758 | 1331   | 178    | 143    | Lactobacillus; uncultured_bacterium         |
| 1107027                       | 1339 | 911  | 1074 | 0      | 3589   | 2878   | Lactobacillus; uncultured_bacterium         |
| 318764                        | 563  | 267  | 650  | 0      | 133    | 133    | Lactobacillus; uncultured_bacterium         |
| 864573                        | 182  | 232  | 182  | 88     | 7      | 9      | Lactobacillus; uncultured_bacterium         |
| New.ReferenceOTU144           | 272  | 159  | 303  | 2      | 52     | 41     | Lactobacillus; uncultured_bacterium         |
| 306306                        | 36   | 102  | 63   | 34     | 2      | 7      | Lactobacillus; uncultured_bacterium         |
| 128227                        | 118  | 100  | 164  | 16     | 22     | 12     | Lactobacillus; uncultured_bacterium         |
| 760273                        | 62   | 91   | 62   | 124    | 24     | 21     | Lactobacillus; uncultured_bacterium         |
| 4388035                       | 194  | 71   | 256  | 0      | 59     | 51     | Lactobacillus; uncultured_bacterium         |
| New.ReferenceOTU173           | 53   | 47   | 64   | 0      | 0      | 0      | Lactobacillus; uncultured_bacterium         |
| New.ReferenceOTU140           | 58   | 29   | 46   | 0      | 52     | 62     | Lactobacillus; uncultured_bacterium         |
| New.ReferenceOTU139           | 38   | 24   | 29   | 0      | 17     | 7      | Lactobacillus; uncultured_bacterium         |
| 312727                        | 17   | 19   | 11   | 0      | 1      | 2      | Lactobacillus; uncultured_bacterium         |
| 435897                        | 69   | 19   | 77   | 0      | 82     | 65     | Lactobacillus; uncultured_bacterium         |
| 182764                        | 6    | 18   | 14   | 55     | 2      | 5      | Lactobacillus; uncultured_bacterium         |
| 773251                        | 38   | 16   | 43   | 0      | 38     | 26     | Lactobacillus; uncultured_bacterium         |
| 813944                        | 19   | 16   | 14   | 7      | 1      | 1      | Lactobacillus; uncultured_bacterium         |
| New.CleanUp.ReferenceOTU16264 | 16   | 16   | 9    | 6      | 0      | 0      | Lactobacillus; uncultured_bacterium         |
| New.ReferenceOTU254           | 13   | 15   | 14   | 9      | 13     | 14     | Lactobacillus; uncultured_bacterium         |
| 682888                        | 13   | 14   | 12   | 3      | 0      | 1      | Lactobacillus; uncultured_bacterium         |
| 15129                         | 5    | 13   | 2    | 2      | 0      | 0      | Lactobacillus; uncultured_bacterium         |
| New.CleanUp.ReferenceOTU38031 | 3    | 11   | 9    | 3      | 3      | 2      | Lactobacillus; uncultured_bacterium         |
| New.ReferenceOTU154           | 6    | 9    | 14   | 0      | 21     | 37     | Lactobacillus; uncultured_bacterium         |
| 307193                        | 3    | 8    | 1    | 3      | 0      | 0      | Lactobacillus; uncultured_bacterium         |
| 318320                        | 6    | 7    | 2    | 3      | 0      | 0      | Lactobacillus; uncultured_bacterium         |
| 137042                        | 2    | 6    | 4    | 3      | 0      | 1      | Lactobacillus; uncultured_bacterium         |
| New.ReferenceOTU226           | 6    | 6    | 4    | 3      | 0      | 0      | Lactobacillus; uncultured_bacterium         |
| 634900                        | 1    | 5    | 1    | 1      | 0      | 1      | Lactobacillus; uncultured_bacterium         |
| New.CleanUp.ReferenceOTU5528  | 0    | 4    | 0    | 1      | 0      | 0      | Lactobacillus; uncultured_bacterium         |
| New.CleanUp.ReferenceOTU17615 | 4    | 4    | 4    | 3      | 0      | 1      | Lactobacillus; uncultured_bacterium         |
| New.CleanUp.ReferenceOTU32630 | 0    | 4    | 4    | 9      | 2      | 2      | Lactobacillus; uncultured_bacterium         |
| 266415                        | 6    | 3    | 2    | 3      | 0      | 1      | Lactobacillus; uncultured_bacterium         |
| New.CleanUp.ReferenceOTU9653  | 7    | 3    | 5    | 8      | 0      | 1      | Lactobacillus; uncultured_bacterium         |
| New.CleanUp.ReferenceOTU25773 | 3    | 3    | 4    | 0      | 3      | 0      | Lactobacillus; uncultured_bacterium         |
| New.CleanUp.ReferenceOTU35279 | 5    | 3    | 3    | 0      | 1      | 0      | Lactobacillus; uncultured_bacterium         |
| New.CleanUp.ReferenceOTU37079 | 0    | 3    | 0    | 0      | 0      | 0      | Lactobacillus; uncultured_bacterium         |
| 327414                        | 4    | 2    | 3    | 3      | 3      | 3      | Lactobacillus; uncultured_bacterium         |
| 817146                        | 4    | 2    | 3    | 0      | 8      | 23     | Lactobacillus; uncultured_bacterium         |
| 296942                        | 21   | 2    | 19   | 0      | 103    | 143    | Lactobacillus; uncultured_bacterium         |
| New.CleanUp.ReferenceOTU21240 | 5    | 2    | 3    | 0      | 1      | 1      | Lactobacillus; uncultured_bacterium         |
| 577132                        | 8    | 1    | 5    | 0      | 6      | 6      | Lactobacillus; uncultured_bacterium         |
| 269125                        | 1    | 1    | 2    | 0      | 1      | 1      | Lactobacillus; uncultured_bacterium         |
| 354971                        | 2    | 1    | 1    | 2      | 0      | 2      | Lactobacillus; uncultured_bacterium         |
| 303889                        | 4    | 1    | 4    | 0      | 25     | 31     | Lactobacillus; uncultured_bacterium         |
| 271867                        | 1    | 1    | 1    | 0      | 1      | 1      | Lactobacillus; uncultured_bacterium         |
| New.ReferenceOTU75            | 3    | 1    | 0    | 0      | 5      | 14     | Lactobacillus; uncultured_bacterium         |
| New.ReferenceOTU236           | 2    | 1    | 1    | 0      | 0      | 0      | Lactobacillus; uncultured_bacterium         |
| New.ReferenceOTU120           | 2    | 1    | 1    | 0      | 1      | 0      | Lactobacillus; uncultured_bacterium         |
| New.ReferenceOTU157           | 0    | 1    | 1    | 0      | 1      | 0      | Lactobacillus; uncultured_bacterium         |
| New.ReferenceOTU166           | 5    | 1    | 5    | 0      | 7      | 21     | Lactobacillus; uncultured_bacterium         |
| New.ReferenceOTU176           | 2    | 1    | 8    | 0      | 24     | 8      | Lactobacillus; uncultured_bacterium         |
| New.ReferenceOTU191           | 1    | 1    | 1    | 0      | 3      | 5      | Lactobacillus; uncultured_bacterium         |
| New.ReferenceOTU215           | 0    | 1    | 1    | 0      | 0      | 0      | Lactobacillus; uncultured_bacterium         |
| New.CleanUp.ReferenceOTU11890 | 0    | 1    | 0    | 6      | 0      | 0      | Lactobacillus; uncultured_bacterium         |
| New.CleanUp.ReferenceOTU37032 | 0    | 1    | 1    | 0      | 1      | 0      | Lactobacillus; uncultured_bacterium         |
| New.CleanUp.ReferenceOTU44967 | 0    | 1    | 0    | 2      | 0      | 0      | Lactobacillus; uncultured_bacterium         |
| 274016                        | 0    | 0    | 0    | 0      | 2      | 5      | Lactobacillus; uncultured_bacterium         |
| 426769                        | 1    | 0    | 0    | 0      | 3      | 0      | Lactobacillus; uncultured_bacterium         |
| 135956                        | 3    | 0    | 1    | 0      | 7      | 10     | Lactobacillus; uncultured_bacterium         |
| 567604                        | 1    | 0    | 6    | 0      | 0      | 1      | Lactobacillus; uncultured_bacterium         |
| 271784                        | 2    | 0    | 0    | 0      | 5      | 4      | Lactobacillus; uncultured_bacterium         |
| 133892                        | 4    | 0    | 0    | 0      | 4      | 3      | Lactobacillus; uncultured_bacterium         |
| 751643                        | 1    | 0    | 1    | 0      | 5      | 3      | Lactobacillus; uncultured_bacterium         |
| 392417                        | 1    | 0    | 3    | 0      | 2      | 10     | Lactobacillus; uncultured_bacterium         |
| New.ReferenceOTU229           | 2    | 0    | 5    | 0      | 1      | 7      | Lactobacillus; uncultured_bacterium         |
| New.ReferenceOTU265           | 3    | 0    | 1    | 0      | 9      | 4      | Lactobacillus; uncultured_bacterium         |
| New.ReferenceOTU170           | 0    | 0    | 1    | 3      | 0      | 0      | Lactobacillus; uncultured_bacterium         |
| New.ReferenceOTU87            | 0    | 0    | 2    | 0      | 4      | 4      | Lactobacillus; uncultured_bacterium         |
| New.ReferenceOTU190           | 0    | 0    | 0    | 0      | 34     | 29     | Lactobacillus; uncultured_bacterium         |
| New.ReferenceOTU42            | 0    | 0    | 0    | 0      | 13     | 9      | Lactobacillus; uncultured_bacterium         |
| New.CleanUp.ReferenceOTU862   | 1    | 0    | 0    | 0      | 1      | 7      | Lactobacillus; uncultured_bacterium         |
| New.CleanUp.ReferenceOTU1072  | 0    | 0    | 0    | 1      | 0      | 0      | Lactobacillus; uncultured_bacterium         |
| New.CleanUp.ReferenceOTU4061  | 0    | 0    | 1    | 0      | 0      | 0      | Lactobacillus; uncultured_bacterium         |
| New.CleanUp.ReferenceOTU4903  | 1    | 0    | 0    | 0      | 0      | 0      | Lactobacillus; uncultured_bacterium         |
| New.CleanUp.ReferenceOTU9738  | 2    | 0    | 0    | 0      | 3      | 2      | Lactobacillus; uncultured_bacterium         |
| New.CleanUp.ReferenceOTU13239 | 0    | 0    | 0    | 13     | 1      | 1      | Lactobacillus; uncultured_bacterium         |
| New.CleanUp.ReferenceOTU14374 | 0    | 0    | 0    | 0      | 1      | 0      | Lactobacillus; uncultured_bacterium         |
| New.CleanUp.ReferenceOTU14784 | 0    | 0    | 0    | 0      | 1      | 0      | Lactobacillus; uncultured_bacterium         |
| New.CleanUp.ReferenceOTU19489 | 1    | 0    | 0    | 0      | 0      | 0      | Lactobacillus; uncultured_bacterium         |
| New.CleanUp.ReferenceOTU19528 | 1    | 0    | 1    | 0      | 1      | 0      | Lactobacillus; uncultured_bacterium         |
| New.CleanUp.ReferenceOTU23138 | 0    | 0    | 0    | 47     | 1      | 2      | Lactobacillus; uncultured_bacterium         |
| New.CleanUp.ReferenceOTU25191 | 0    | 0    | 0    | 8      | 0      | 0      | Lactobacillus; uncultured_bacterium         |
| New.CleanUp.ReferenceOTU26698 | 0    | 0    | 2    | 0      | 0      | 1      | Lactobacillus; uncultured_bacterium         |
| New.CleanUp.ReferenceOTU31848 | 0    | 0    | 1    | 0      | 4      | 2      | Lactobacillus; uncultured_bacterium         |
| New.CleanUp.ReferenceOTU33687 | 0    | 0    | 3    | 2      | 0      | 1      | Lactobacillus; uncultured_bacterium         |
| New.CleanUp.ReferenceOTU38531 | 3    | 0    | 0    | 0      | 0      | 1      | Lactobacillus; uncultured_bacterium         |
| New.CleanUp.ReferenceOTU40991 | 0    | 0    | 5    | 0      | 5      | 5      | Lactobacillus; uncultured_bacterium         |
| New.CleanUp.ReferenceOTU41201 | 0    | 0    | 0    | 0      | 1      | 0      | Lactobacillus; uncultured_bacterium         |
| New.CleanUp.ReferenceOTU41586 | 0    | 0    | 0    | 1      | 0      | 0      | Lactobacillus; uncultured_bacterium         |
| New.CleanUp.ReferenceOTU42562 | 5    | 0    | 6    | 0      | 4      | 3      | Lactobacillus; uncultured_bacterium         |
| New.CleanUp.ReferenceOTU44585 | 3    | 0    | 0    | 0      | 5      | 5      | Lactobacillus; uncultured_bacterium         |
| New.CleanUp.ReferenceOTU11205 | 0    | 0    | 0    | 6      | 1      | 0      | Lactobacillus; uncultured_compost_bacterium |

Table S2.

| 145 OTUs                      | MRL | MRL | MRL | MRL/lpr | MRL/lpr | MRL/lpr | taxonomy                                                                                               |
|-------------------------------|-----|-----|-----|---------|---------|---------|--------------------------------------------------------------------------------------------------------|
| ID                            | 71  | 70  | 69  | 84      | 86      | 85      |                                                                                                        |
| 1105328                       | 0   | 1   | 0   | 0       | 1       | 0       | Bacteria; Firmicutes; Clostridia; Clostridiales; Lachnospiraceae; Coprococcus; uncultured_bacterium    |
| 717509                        | 5   | 3   | 7   | 10      | 4       | 11      | Bacteria; Firmicutes; Clostridia; Clostridiales; Lachnospiraceae; Coprococcus; uncultured_bacterium    |
| 194662                        | 0   | 1   | 0   | 2       | 6       | 9       | Bacteria; Firmicutes; Clostridia; Clostridiales; Lachnospiraceae; Incertae_Sedis; uncultured_bacterium |
| 1110862                       | 0   | 1   | 0   | 1       | 0       | 0       | Bacteria; Firmicutes; Clostridia; Clostridiales; Lachnospiraceae; Incertae_Sedis; uncultured_bacterium |
| 586030                        | 4   | 7   | 8   | 5       | 9       | 19      | Bacteria; Firmicutes; Clostridia; Clostridiales; Lachnospiraceae; Incertae_Sedis; uncultured_bacterium |
| 575122                        | 0   | 0   | 1   | 0       | 1       | 0       | Bacteria; Firmicutes; Clostridia; Clostridiales; Lachnospiraceae; Incertae_Sedis; uncultured_bacterium |
| 846244                        | 5   | 2   | 1   | 18      | 11      | 42      | Bacteria; Firmicutes; Clostridia; Clostridiales; Lachnospiraceae; Incertae_Sedis; uncultured_bacterium |
| 565357                        | 2   | 0   | 2   | 1       | 13      | 25      | Bacteria; Firmicutes; Clostridia; Clostridiales; Lachnospiraceae; Incertae_Sedis; uncultured_bacterium |
| 198061                        | 1   | 5   | 3   | 7       | 0       | 0       | Bacteria; Firmicutes; Clostridia; Clostridiales; Lachnospiraceae; Incertae_Sedis; uncultured_bacterium |
| 1111191                       | 1   | 9   | 6   | 3       | 10      | 9       | Bacteria; Firmicutes; Clostridia; Clostridiales; Lachnospiraceae; Incertae_Sedis; uncultured_bacterium |
| 354634                        | 10  | 5   | 9   | 15      | 7       | 4       | Bacteria; Firmicutes; Clostridia; Clostridiales; Lachnospiraceae; Incertae_Sedis; uncultured_bacterium |
| 653533                        | 3   | 2   | 2   | 18      | 11      | 12      | Bacteria; Firmicutes; Clostridia; Clostridiales; Lachnospiraceae; Incertae_Sedis; uncultured_bacterium |
| 448395                        | 1   | 0   | 0   | 0       | 0       | 0       | Bacteria; Firmicutes; Clostridia; Clostridiales; Lachnospiraceae; Incertae_Sedis; uncultured_bacterium |
| New.ReferenceOTU49            | 1   | 0   | 2   | 0       | 0       | 0       | Bacteria; Firmicutes; Clostridia; Clostridiales; Lachnospiraceae; Incertae_Sedis; uncultured_bacterium |
| New.CleanUp.ReferenceOTU7755  | 0   | 0   | 0   | 0       | 0       | 1       | Bacteria; Firmicutes; Clostridia; Clostridiales; Lachnospiraceae; Incertae_Sedis; uncultured_bacterium |
| New.CleanUp.ReferenceOTU15946 | 0   | 0   | 0   | 0       | 4       | 2       | Bacteria; Firmicutes; Clostridia; Clostridiales; Lachnospiraceae; Incertae_Sedis; uncultured_bacterium |
| 342786                        | 0   | 0   | 0   | 11      | 0       | 1       | Bacteria; Firmicutes; Clostridia; Clostridiales; Lachnospiraceae; Marvinbryantia; uncultured_bacterium |
| 768294                        | 0   | 0   | 0   | 41      | 1       | 3       | Bacteria; Firmicutes; Clostridia; Clostridiales; Lachnospiraceae; Roseburia; uncultured_bacterium      |
| 428255                        | 1   | 3   | 0   | 6       | 68      | 320     | Bacteria; Firmicutes; Clostridia; Clostridiales; Lachnospiraceae; Roseburia; uncultured_bacterium      |
| 349864                        | 3   | 1   | 5   | 72      | 0       | 0       | Bacteria; Firmicutes; Clostridia; Clostridiales; Lachnospiraceae; Roseburia; uncultured_bacterium      |
| 531695                        | 0   | 0   | 0   | 0       | 1       | 0       | Bacteria; Firmicutes; Clostridia; Clostridiales; Lachnospiraceae; Roseburia; uncultured_bacterium      |
| 170248                        | 0   | 23  | 0   | 0       | 0       | 1       | Bacteria; Firmicutes; Clostridia; Clostridiales; Lachnospiraceae; Roseburia; uncultured_bacterium      |
| 344726                        | 2   | 1   | 3   | 4       | 2       | 3       | Bacteria; Firmicutes; Clostridia; Clostridiales; Lachnospiraceae; Roseburia; uncultured_bacterium      |
| 272080                        | 0   | 8   | 0   | 16      | 5       | 10      | Bacteria; Firmicutes; Clostridia; Clostridiales; Lachnospiraceae; Roseburia; uncultured_bacterium      |
| New.CleanUp.ReferenceOTU17942 | 0   | 0   | 0   | 0       | 6       | 16      | Bacteria; Firmicutes; Clostridia; Clostridiales; Lachnospiraceae; Roseburia; uncultured_bacterium      |
| 468313                        | 27  | 83  | 78  | 1       | 0       | 0       | Bacteria; Firmicutes; Clostridia; Clostridiales; Lachnospiraceae; Roseburia; uncultured_organism       |
| 833816                        | 0   | 0   | 0   | 17      | 0       | 0       | Bacteria; Firmicutes; Clostridia; Clostridiales; Lachnospiraceae; uncultured; uncultured_bacterium     |
| 309054                        | 0   | 2   | 0   | 2       | 3       | 4       | Bacteria; Firmicutes; Clostridia; Clostridiales; Lachnospiraceae; uncultured; uncultured_bacterium     |
| 355850                        | 0   | 0   | 0   | 0       | 27      | 22      | Bacteria; Firmicutes; Clostridia; Clostridiales; Lachnospiraceae; uncultured; uncultured_bacterium     |
| 277329                        | 0   | 0   | 0   | 1       | 1       | 1       | Bacteria; Firmicutes; Clostridia; Clostridiales; Lachnospiraceae; uncultured; uncultured_bacterium     |
| 617506                        | 0   | 0   | 3   | 10      | 4       | 8       | Bacteria; Firmicutes; Clostridia; Clostridiales; Lachnospiraceae; uncultured; uncultured_bacterium     |
| 459276                        | 1   | 3   | 2   | 4       | 1       | 0       | Bacteria; Firmicutes; Clostridia; Clostridiales; Lachnospiraceae; uncultured; uncultured_bacterium     |
| 346764                        | 5   | 10  | 10  | 15      | 5       | 18      | Bacteria; Firmicutes; Clostridia; Clostridiales; Lachnospiraceae; uncultured; uncultured_bacterium     |
| 312145                        | 1   | 0   | 0   | 0       | 0       | 0       | Bacteria; Firmicutes; Clostridia; Clostridiales; Lachnospiraceae; uncultured; uncultured_bacterium     |
| 271706                        | 0   | 0   | 0   | 0       | 0       | 1       | Bacteria; Firmicutes; Clostridia; Clostridiales; Lachnospiraceae; uncultured; uncultured_bacterium     |
| 273705                        | 0   | 0   | 0   | 2       | 4       | 6       | Bacteria; Firmicutes; Clostridia; Clostridiales; Lachnospiraceae; uncultured; uncultured_bacterium     |
| 354501                        | 0   | 0   | 0   | 10      | 0       | 0       | Bacteria; Firmicutes; Clostridia; Clostridiales; Lachnospiraceae; uncultured; uncultured_bacterium     |
| 356012                        | 0   | 0   | 0   | 23      | 0       | 0       | Bacteria; Firmicutes; Clostridia; Clostridiales; Lachnospiraceae; uncultured; uncultured_bacterium     |
| 393512                        | 0   | 5   | 1   | 3       | 0       | 1       | Bacteria; Firmicutes; Clostridia; Clostridiales; Lachnospiraceae; uncultured; uncultured_bacterium     |
| 388574                        | 0   | 0   | 0   | 0       | 1       | 3       | Bacteria; Firmicutes; Clostridia; Clostridiales; Lachnospiraceae; uncultured; uncultured_bacterium     |
| 1108453                       | 1   | 6   | 0   | 9       | 0       | 7       | Bacteria; Firmicutes; Clostridia; Clostridiales; Lachnospiraceae; uncultured; uncultured_bacterium     |
| 336276                        | 0   | 8   | 0   | 0       | 8       | 3       | Bacteria; Firmicutes; Clostridia; Clostridiales; Lachnospiraceae; uncultured; uncultured_bacterium     |
| 685934                        | 0   | 0   | 2   | 0       | 1       | 1       | Bacteria; Firmicutes; Clostridia; Clostridiales; Lachnospiraceae; uncultured; uncultured_bacterium     |
| 641654                        | 8   | 18  | 9   | 60      | 5       | 7       | Bacteria; Firmicutes; Clostridia; Clostridiales; Lachnospiraceae; uncultured; uncultured_bacterium     |
| 350790                        | 2   | 0   | 2   | 1       | 0       | 0       | Bacteria; Firmicutes; Clostridia; Clostridiales; Lachnospiraceae; uncultured; uncultured_bacterium     |
| 309534                        | 0   | 0   | 0   | 0       | 6       | 12      | Bacteria; Firmicutes; Clostridia; Clostridiales; Lachnospiraceae; uncultured; uncultured_bacterium     |
| 330921                        | 3   | 2   | 7   | 6       | 14      | 7       | Bacteria; Firmicutes; Clostridia; Clostridiales; Lachnospiraceae; uncultured; uncultured_bacterium     |
| 466409                        | 0   | 2   | 0   | 6       | 1       | 1       | Bacteria; Firmicutes; Clostridia; Clostridiales; Lachnospiraceae; uncultured; uncultured_bacterium     |
| 272949                        | 0   | 1   | 0   | 0       | 18      | 68      | Bacteria; Firmicutes; Clostridia; Clostridiales; Lachnospiraceae; uncultured; uncultured_bacterium     |
| 372900                        | 2   | 0   | 0   | 0       | 0       | 1       | Bacteria; Firmicutes; Clostridia; Clostridiales; Lachnospiraceae; uncultured; uncultured_bacterium     |
| 827743                        | 40  | 107 | 55  | 0       | 173     | 296     | Bacteria; Firmicutes; Clostridia; Clostridiales; Lachnospiraceae; uncultured; uncultured_bacterium     |
| 276808                        | 0   | 0   | 0   | 3       | 4       | 1       | Bacteria; Firmicutes; Clostridia; Clostridiales; Lachnospiraceae; uncultured; uncultured_bacterium     |
| 353820                        | 6   | 1   | 1   | 8       | 11      | 10      | Bacteria; Firmicutes; Clostridia; Clostridiales; Lachnospiraceae; uncultured; uncultured_bacterium     |
| 708101                        | 1   | 1   | 0   | 0       | 13      | 7       | Bacteria; Firmicutes; Clostridia; Clostridiales; Lachnospiraceae; uncultured; uncultured_bacterium     |
| 552586                        | 1   | 1   | 0   | 63      | 0       | 0       | Bacteria; Firmicutes; Clostridia; Clostridiales; Lachnospiraceae; uncultured; uncultured_bacterium     |
| 743396                        | 0   | 0   | 0   | 3       | 0       | 5       | Bacteria; Firmicutes; Clostridia; Clostridiales; Lachnospiraceae; uncultured; uncultured_bacterium     |
| 173342                        | 0   | 0   | 1   | 0       | 0       | 0       | Bacteria; Firmicutes; Clostridia; Clostridiales; Lachnospiraceae; uncultured; uncultured_bacterium     |
| 276348                        | 0   | 2   | 0   | 267     | 0       | 0       | Bacteria; Firmicutes; Clostridia; Clostridiales; Lachnospiraceae; uncultured; uncultured_bacterium     |
| 351545                        | 0   | 4   | 7   | 6       | 24      | 43      | Bacteria; Firmicutes; Clostridia; Clostridiales; Lachnospiraceae; uncultured; uncultured_bacterium     |
| 349074                        | 0   | 0   | 0   | 0       | 2       | 4       | Bacteria; Firmicutes; Clostridia; Clostridiales; Lachnospiraceae; uncultured; uncultured_bacterium     |
| 407782                        | 0   | 0   | 0   | 1       | 4       | 0       | Bacteria; Firmicutes; Clostridia; Clostridiales; Lachnospiraceae; uncultured; uncultured_bacterium     |
| 356455                        | 0   | 1   | 1   | 0       | 0       | 0       | Bacteria; Firmicutes; Clostridia; Clostridiales; Lachnospiraceae; uncultured; uncultured_bacterium     |
| 192878                        | 2   | 0   | 0   | 2       | 1       | 3       | Bacteria; Firmicutes; Clostridia; Clostridiales; Lachnospiraceae; uncultured; uncultured_bacterium     |
| 382220                        | 0   | 8   | 2   | 2       | 31      | 63      | Bacteria; Firmicutes; Clostridia; Clostridiales; Lachnospiraceae; uncultured; uncultured_bacterium     |
| 444987                        | 0   | 0   | 0   | 0       | 0       | 1       | Bacteria; Firmicutes; Clostridia; Clostridiales; Lachnospiraceae; uncultured; uncultured_bacterium     |
| 327284                        | 1   | 5   | 2   | 34      | 23      | 81      | Bacteria; Firmicutes; Clostridia; Clostridiales; Lachnospiraceae; uncultured; uncultured_bacterium     |
| 196749                        | 0   | 1   | 0   | 0       | 0       | 0       | Bacteria; Firmicutes; Clostridia; Clostridiales; Lachnospiraceae; uncultured; uncultured_bacterium     |
| 1104569                       | 2   | 8   | 6   | 8       | 8       | 8       | Bacteria; Firmicutes; Clostridia; Clostridiales; Lachnospiraceae; uncultured; uncultured_bacterium     |
| 1076587                       | 0   | 0   | 0   | 3       | 0       | 0       | Bacteria; Firmicutes; Clostridia; Clostridiales; Lachnospiraceae; uncultured; uncultured_bacterium     |
| 275678                        | 0   | 0   | 1   | 0       | 3       | 12      | Bacteria; Firmicutes; Clostridia; Clostridiales; Lachnospiraceae; uncultured; uncultured_bacterium     |
| 261744                        | 0   | 0   | 0   | 0       | 2       | 1       | Bacteria; Firmicutes; Clostridia; Clostridiales; Lachnospiraceae; uncultured; uncultured_bacterium     |
| 1110135                       | 1   | 1   | 0   | 0       | 1       | 0       | Bacteria; Firmicutes; Clostridia; Clostridiales; Lachnospiraceae; uncultured; uncultured_bacterium     |
| 351859                        | 0   | 0   | 2   | 14      | 1       | 2       | Bacteria; Firmicutes; Clostridia; Clostridiales; Lachnospiraceae; uncultured; uncultured_bacterium     |



**Table S3.**

| SampleID | Group   | Lactobacillaceae | Lachnospiraceae | Spleen_weight | MLN_weight | Renal_Function |
|----------|---------|------------------|-----------------|---------------|------------|----------------|
| 37       | Vehicle | 0.191530612      | 0.131020408     | 0.286         | 1.879      | 1              |
| 38       | Vehicle | 0.175            | 0.084795918     | 0.309         | 0.937      | 6              |
| 39       | Vehicle | 0.174795918      | 0.147244898     | 0.486         | 2.354      | 4.6            |
| 42       | Vehicle | 0.183061224      | 0.116428571     | 0.344         | 1.997      | 3.4            |
| 44       | RA      | 0.526020408      | 0.062244898     | 0.341         | 0.941      | 1.2            |
| 45       | RA      | 0.317040816      | 0.057755102     | 0.418         | 0.831      | 1              |
| 47       | VARA    | 0.199489796      | 0.306020408     | 0.469         | 0.763      | 2              |
| 48       | VARA    | 0.157142857      | 0.402755102     | 0.322         | 0.59       | 1.6            |
| 54       | RA      | 0.415            | 0.069285714     | 0.303         | 0.417      | 1.2            |
| 55       | RA      | 0.304183673      | 0.14377551      | 0.28          | 0.763      | 1              |
| 57       | VARA    | 0.105816327      | 0.405918367     | 0.762         | 2.02       | 1.4            |
| 58       | VARA    | 0.247142857      | 0.224081633     | 0.287         | 0.894      | 4.2            |
| 64       | HC      | 0.412653061      | 0.018163265     | 0.092         | 0.034      | 1              |
| 66       | HC      | 0.276122449      | 0.014693878     | 0.142         | 0.031      | 1              |
| 67       | HC      | 0.370102041      | 0.063979592     | 0.098         | 0.02       | 1.4            |
| 68       | HC      | 0.339795918      | 0.005816327     | 0.104         | 0.015      | 1              |

Fig.S1

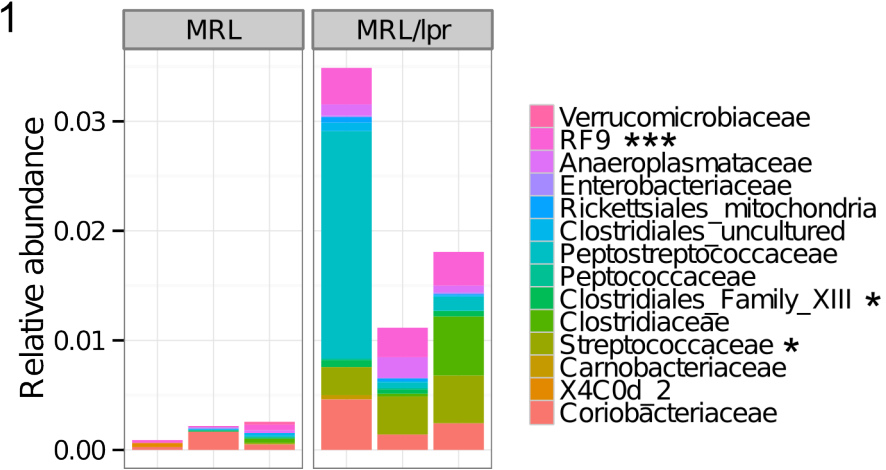

Fig.S2A

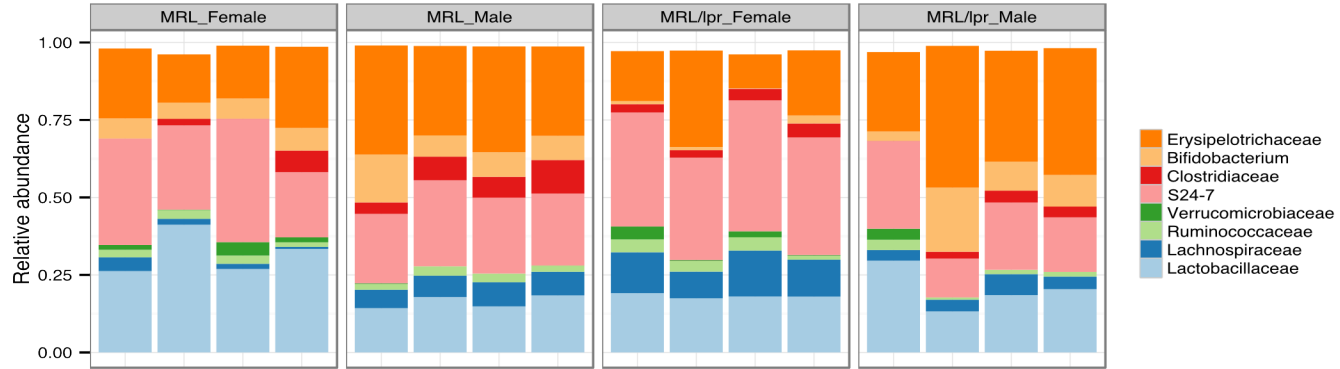

Fig.S2B

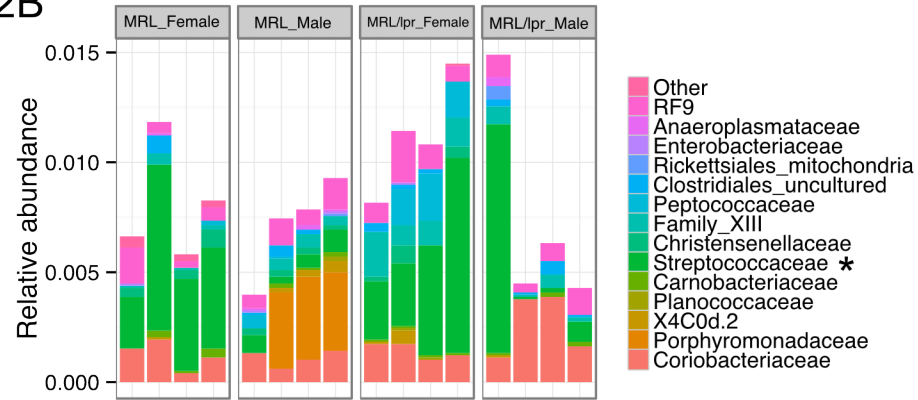

Fig.S2C

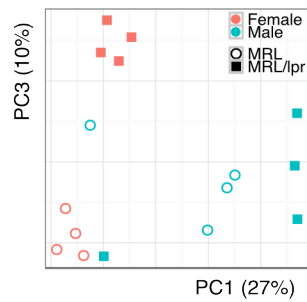

Fig.S2D

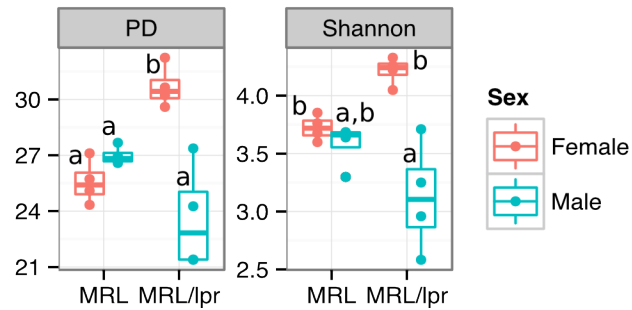

Fig.S3A

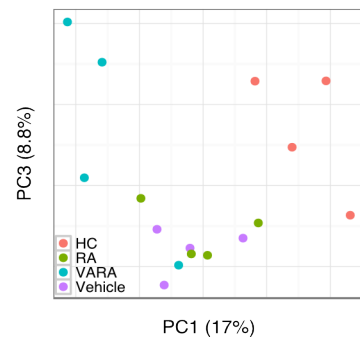

Fig.S3B

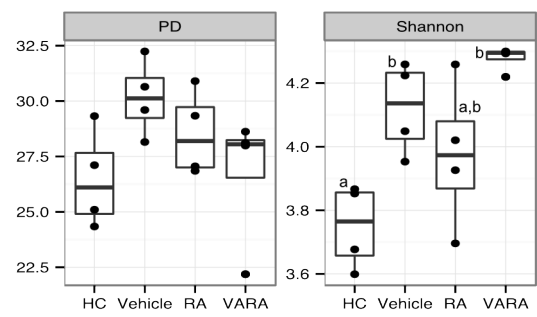

Supplement: AEM.02676-14_zam999105842so1.pdf [file AEM.02676-14_zam999105842so1.pdf]
